## MicroRNA-218 inhibits proliferation and invasion in ovarian cancer by targeting Runx2

Na Li<sup>1</sup>, Lufei Wang<sup>2</sup>, Guangyun Tan<sup>3</sup>, Zhiheng Guo<sup>1</sup>, Lei Liu<sup>1</sup>, Ming Yang<sup>4,\*</sup> and Jin He<sup>1,\*</sup>

<sup>1</sup>Department of Gynecology and Obstetrics, The First Hospital of Jilin University, Changchun, Jilin 130021, PR China

<sup>2</sup>Department of Ophthalmology, The Second Hospital of Jilin University, Changchun, Jilin 130022, PR China

<sup>3</sup>Department of Immunology, Institute of Translational Medicine of The First Hospital of Jilin University, Changchun, Jilin 130021, PR China

<sup>4</sup>Department of Breast Surgery, The First Hospital of Jilin University, Changchun, Jilin 130021, PR China

\*These authors have contributed equally to this work

**Correspondence to:** Ming Yang, **email:** yangming196701@163.com  
Jin He, **email:** jinhe1204@126.com

**Keywords:** MiR-218, ovarian cancer, RUNX2, proliferation, invasion

**Received:** April 07, 2017

**Accepted:** July 19, 2017

**Published:** September 16, 2017

**Copyright:** Li et al. This is an open-access article distributed under the terms of the Creative Commons Attribution License 3.0 (CC BY 3.0), which permits unrestricted use, distribution, and reproduction in any medium, provided the original author and source are credited.

### ABSTRACT

**MicroRNA-218 (miR-218) has been implicated in the development and progression of multiple cancers. We investigated the role of miR-218 in ovarian cancer progression. We found that miR-218 expression levels were lower in ovarian cancer tissues and cell lines than in adjacent normal tissues or a normal ovarian cell line. miR-218 levels associated with International Federation of Gynecology and Obstetrics (FIGO) stage and lymph node metastasis. Exogenous expression of miR-218 inhibited cell proliferation, colony formation, migration, and invasion *in vitro* and suppressed tumor growth in a tumor-bearing nude mouse model. Runt-related transcription factor 2 (RUNX2) was identified as a direct functional target of miR-218, and its expression was inversely correlated with miR-218 expression in ovarian cancer tissues. RUNX2 overexpression rescued the suppressive effect of miR-218 on ovarian cancer cell proliferation, colony formation, migration, and invasion. These findings highlight an important role played by miR-218 in the regulation of cancer growth and metastasis, in part by repressing RUNX2, and revealed the potential of miR-218 as a new therapeutic target in ovarian cancer.**

### INTRODUCTION

Ovarian cancer is the leading cause of death from gynecological malignancies [1]. Unfortunately, treatments, which include extensive surgery, radiotherapy, chemotherapy, or concurrent chemo/radiation, are not effective for patients with advanced ovarian cancer mainly due to tumor recurrence, metastasis, or poor response to chemo/radiotherapy [2, 3]. Thus, development of new therapy target for ovarian cancer treatment is still urgently needed.

MicroRNAs (miRNAs), a class of short non-coding RNAs, are involved in the regulation of a variety of biological processes, such as cell proliferation, cell cycle, cell migration and invasion, glucose and lipid metabolism, signal transduction, and response to external stimuli [4, 5]. miRNAs are aberrantly expressed in various types of cancer and play crucial roles in cancer initiation, development, and metastasis by regulating cancer-related target genes [6, 7]. Recently, many miRNAs have been implicated in ovarian cancer progression, serving as oncogenes or tumor suppressors [8, 9].

miR-218 is significantly downregulated in colorectal [10], gastric [11], non-small cell lung [12], breast [13], colon [14], liver [15], and nasopharyngeal cancer [16], supporting miR-218 as a tumor suppressor in these types of cancers. In the present study, we sought to clarify the role of miR-218 in ovarian cancer by using *in vitro* and *in vivo* assays and analysis of clinical ovarian cancer tissue samples.

## RESULTS

### MiR-218 is downregulated in ovarian cancer tissues and cell lines

We first investigated the expression of miR-218 in four ovarian cancer cell lines (SW626, A2780, SKOV3, OVCAR3) and human ovarian surface epithelial (HOSE) cells. We found that miR-218 expression was downregulated in all four ovarian cancer cell lines compared to the levels noted in the normal ovarian cell line (Figure 1A). SKOV3 cells possessed the lowest miR-218 expression (Figure 1A) and were therefore selected for subsequent studies. We examined miR-218 expression in 48 pairs of ovarian cancer tissues and adjacent normal tissues, and found that miR-218 expression was significantly downregulated in ovarian cancer tissues compared with adjacent normal tissues (Figure 1B). To further investigate the clinicopathological significance of miR-218 level in patients with ovarian cancer, 48 patients were divided into 2 subgroups based on mean level of miR-218 expression (0.297) of all samples: a low miR-218 group (<0.297, 27 cases) and a high miR-218 group (>0.297, 21 cases). Further statistical analysis demonstrated that lower levels of miR-218 were significantly associated with the malignant progression of

ovarian cancer, including lymph nodal metastasis, FIGO stage, and histological grading (all  $p < 0.01$ , Table 1).

### MiR-218 inhibits cell growth, invasion, and migration *in vitro*

To explore the possible biological functions of miR-218 in ovarian cancer cells, SKOV3 cells were transfected with miR-218 mimic or miR-NC, and then cell proliferation, colony formation, migration, and invasion were evaluated. qPCR showed that miR-218 expression was significantly increased in cells transfected with miR-218 mimic compared with cells transfected with miR-NC (Figure 2A). CCK8 assays demonstrated that cell proliferation was significantly inhibited by miR-218 overexpression in a time-dependent manner (Figure 2B). Consistent with this result, miR-218 overexpression obviously inhibited colony formation in ovarian cancer cells (Figure 2C). Wound healing and transwell invasion assays were performed to measure the migration and invasion ability of ovarian cancer cells after modification of miR-218 expression. We found that miR-218 overexpression significantly suppressed cell migration and invasion ability of ovarian cancer cells (Figure 2D and 2E).

### RUNX2 is a target of miR-218 in ovarian cancer cells

We identified the potential targets of miR-218 using a publicly available algorithm TargetScan and found a conserved miR-218 binding site in the 3'-UTR of *RUNX2* mRNA (Figure 3A). We then used a dual luciferase reporter system to test the effect of miR-218 on *RUNX2*. As shown in Figure 4B, miR-218 dramatically inhibited the

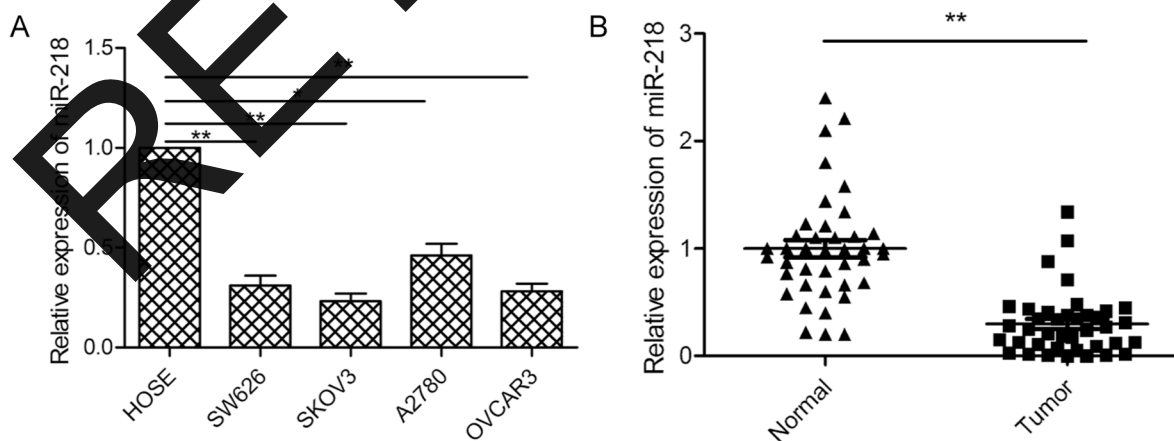

**Figure 1: miR-218 expression was downregulated in ovarian cancer cell lines and tissues.** (A) The relative expression level of miR-218 was measured by qPCR in four ovarian cell lines (SW626, A2780, SKOV3, OVCAR3) and HOSE cells. U6 was used for normalization. (B) The relative expression level of miR-218 was detected by qPCR in 48 pairs of ovarian cancer tissues and adjacent normal tissues. U6 was used for normalization. \*Indicates significant difference at  $p < 0.05$ ; \*\*Indicates significant difference at  $p < 0.01$ .

**Table 1: Association between miR-218 expression and clinicopathological features of human ovarian cancer**

| Variables             | No. of cases | miR-218 expression |            | p-value        |
|-----------------------|--------------|--------------------|------------|----------------|
|                       |              | Low (n %)          | High (n %) |                |
| Age(years)            |              |                    |            | <i>p</i> >0.05 |
| <50                   | 23           | 13(56.5)           | 10(43.5)   |                |
| ≥50                   | 25           | 14(56.0)           | 11(44.0)   |                |
| Gender                |              |                    |            | <i>p</i> >0.05 |
| Male                  | 19           | 10(52.6)           | 9(47.4)    |                |
| Female                | 29           | 17(58.6)           | 12(41.4)   |                |
| TNM stage             |              |                    |            | <i>p</i> <0.01 |
| I-II                  | 31           | 12(38.7)           | 19(61.3)   |                |
| III-IV                | 17           | 15(88.2)           | 2(11.8)    |                |
| Tumor size            |              |                    |            | <i>p</i> >0.05 |
| <5 cm                 | 30           | 18(60.0)           | 12(40.0)   |                |
| ≥5 cm                 | 18           | 9(50.0)            | 9(50.0)    |                |
| Lymph node metastasis |              |                    |            | <i>p</i> <0.01 |
| No                    | 33           | 13(39.4)           | 20(60.6)   |                |
| Yes                   | 15           | 14(93.3)           | 1(6.7)     |                |

luciferase activity of the wild-type (WT) RUNX2-3'UTR but not that of the mutant (MT) 3'UTR (Figure 3B). To further demonstrate the effect of miR-218 on RUNX2 expression, we examined the expression of RUNX2 in SKOV3 cells transfected with miR-218 mimic or miR-NC by qPCR or Western blot, respectively. We found that miR-218 overexpression clearly inhibited RUNX2 expression on the mRNA and protein levels (Figure 3C and 3D). These results demonstrate that RUNX2 might be a direct target of miR-218 in ovarian cancer.

#### Inverse correlation between RUNX2 and miR-218 expression in ovarian cancer

To explore the possible clinical relevance of RUNX2, we investigated the expression levels of runx2 in human ovarian tissues. qPCR analysis showed that RUNX2 mRNA expression was significantly upregulated in ovarian cancer tissues compared to the adjacent normal tissues (Figure 4A). Next, we further analyzed the correlation between RUNX2 mRNA levels and miR-218 expression levels in the same human ovarian cancer specimens using Spearman's rank correlation analysis. As indicated in Figure 4B, RUNX2 mRNA expression levels in ovarian cancer tissues were inversely correlated with miR-218 expression levels ( $r = -0.566$ ;  $p = 0.002$ ). We also found that RUNX2 expression was increased in four

ovarian cancer cell lines compared to the normal cell line both on the mRNA and protein levels (Figure 4C and 4D).

#### Restoration of RUNX2 reverses miR-218-suppressed cell proliferation, colony formation, migration, and invasion

To clarify whether RUNX2 was involved in the miR-218-mediated tumor suppressive effects in ovarian cancer cells, we performed a restoration experiment by co-transfecting RUNX2 and miR-218 mimic into ovarian cancer cells. As shown in Figure 5A, RUNX2 overexpression rescued miR-218-suppressed RUNX2 protein level in SKOV3 cells. Importantly, RUNX2 overexpression also restored miR-218-inhibited cell proliferation, colony formation, migration, and invasion of ovarian cancer cells (Figure 5B–5E).

#### miR-218 suppresses ovarian cancer tumorigenicity *in vivo* by targeting RUNX2

SKOV3 cells stably expressing miR-218 or miR-NC were subcutaneously inoculated into nude mice, and tumor sizes were measured 5 days after injection. Compared with the miR-218 group, the miR-NC group developed significantly larger tumors starting from days 15 to 30 (Figure 6A). At the end of the treatment, mice

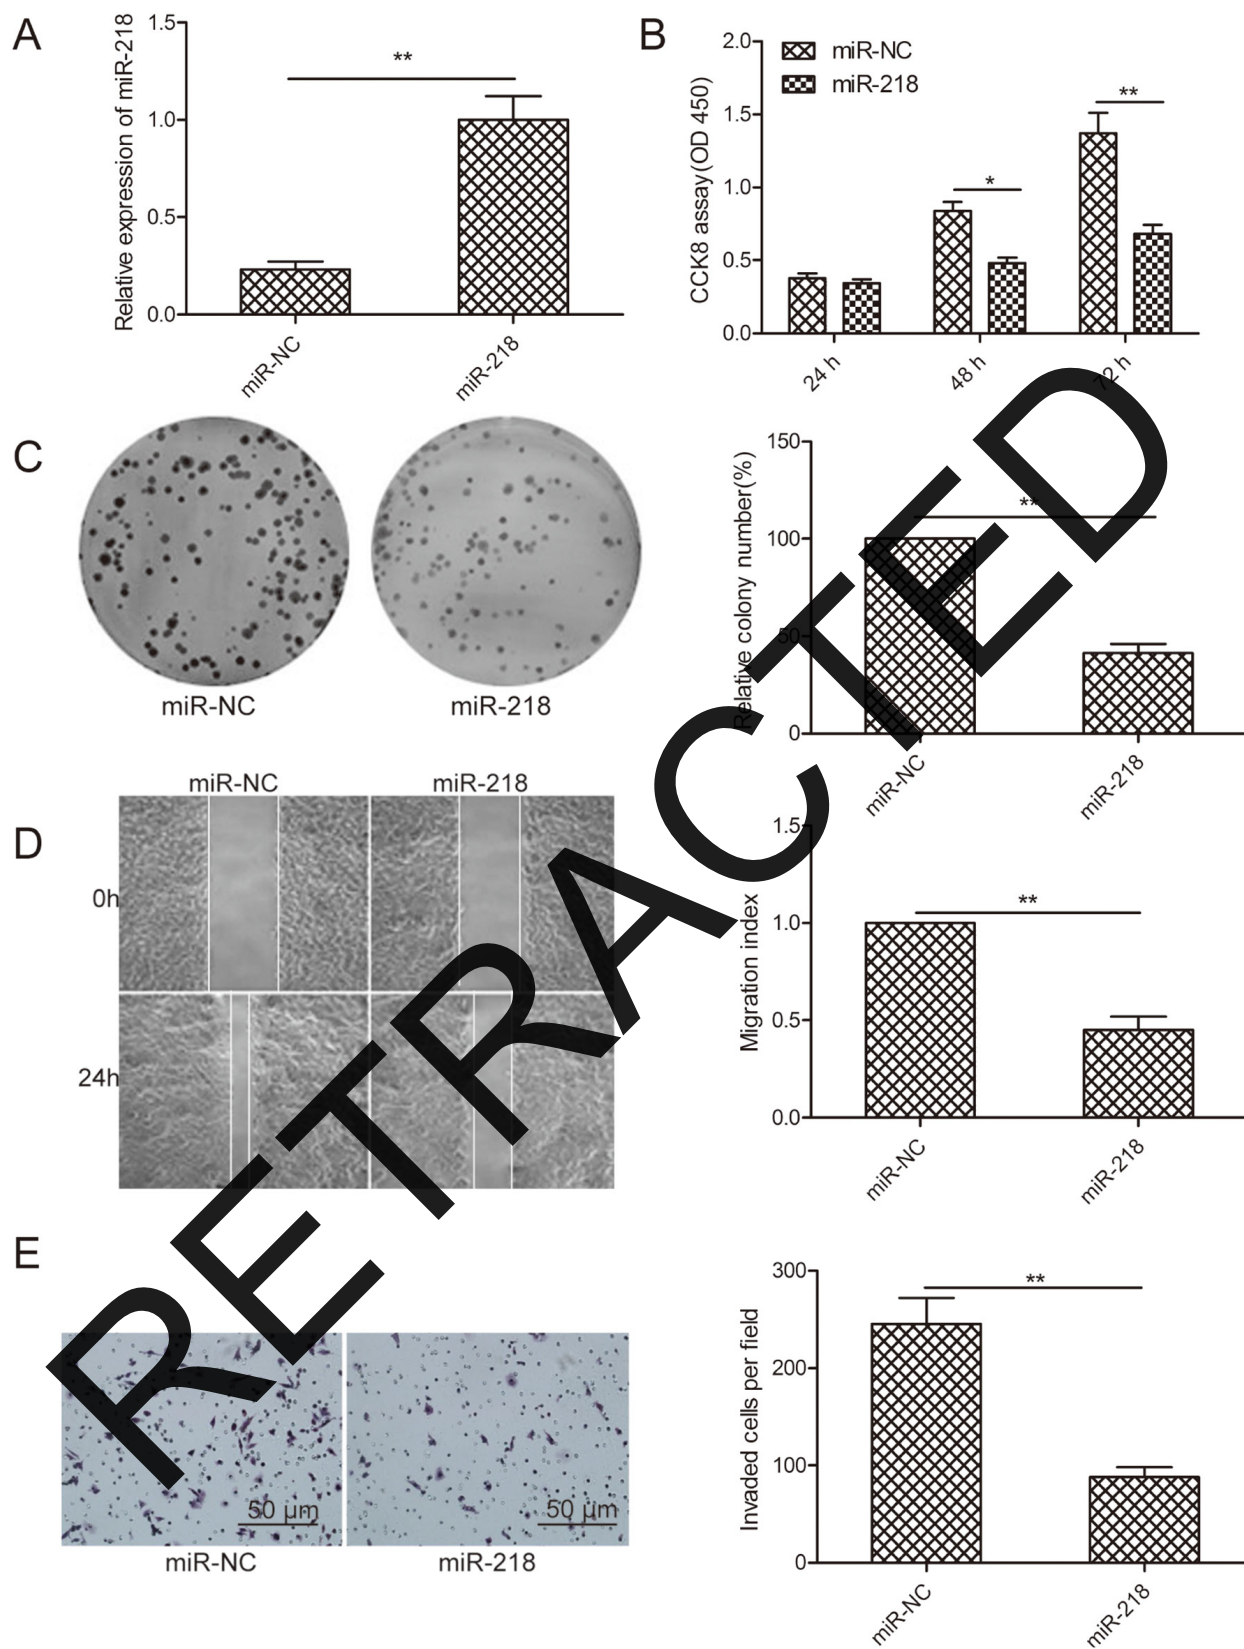

**Figure 2: MiR-218 inhibits cell proliferation, colony formation, migration, and invasion of ovarian cancer cells. (A)** The relative expression level of miR-218 was determined by qPCR in SKOV3 cells transfected with miR-218 mimic or miR-NC. U6 was used for normalization. **(B-E)** Cell proliferation, colony formation, migration, and invasion were determined by qPCR in SKOV3 cells transfected with miR-218 mimic or miR-NC. \*Indicates significant difference at  $p < 0.05$ ; \*\*Indicates significant difference at  $p < 0.01$ .

were killed and tumor tissues were dissected and weighed. A significant decrease in tumor size and weight were observed in the miR-218 group compared with the miR-NC group (Figure 6B and 6C). Consistent with *in vitro* data, the miR-218 level in tumor tissues from the miR-218 group were much higher than those of the miR-NC group (Figure 6D), whereas RUNX2 protein expression was decreased in the miR-218 group compared to the miR-NC group (Figure 6E).

## DISCUSSION

miRNAs have been shown to be involved in ovarian cancer progression and carcinogenesis through regulating the expression of a variety of cancer-related genes [8, 9, 17]. In this study, we observed that miR-218 was frequently downregulated in human ovarian cancer samples and cell lines, which was inconsistent with a previous report that miR-218 was upregulated in tumor tissues from ovarian cancer-bearing mice [18]. However, the results of this previous study were not verified in

human ovarian cancer tissues. Our results also demonstrate that low miR-218 expression was significantly associated with poor prognostic clinicopathological parameters, such as high histological grading, advanced FIGO stage (III/IV), and lymph node metastasis. Overexpression of miR-218 suppressed ovarian cancer cell proliferation, migration, and invasion *in vitro* and inhibited tumor growth *in vivo*. We identified and confirmed RUNX2 as a direct and functional target of miR-218 in ovarian cancer.

miR-218 is significantly downregulated, and functions as tumor suppressor in multiple cancers [10-16, 19, 20]. However, the biological function of miR-218 in ovarian cancer remains largely unclear. We found that miR-218 expression was downregulated in ovarian cancer tissues and cell lines, and that overexpression of miR-218 impaired proliferation, colony formation, invasion and migration, as well as suppressed tumor growth in bearing nude mice models. These results indicate that miR-218 has a tumor-suppressive role in ovarian cancer.

miRNAs exert their biological function through regulating specific target genes [4, 5]. To explore

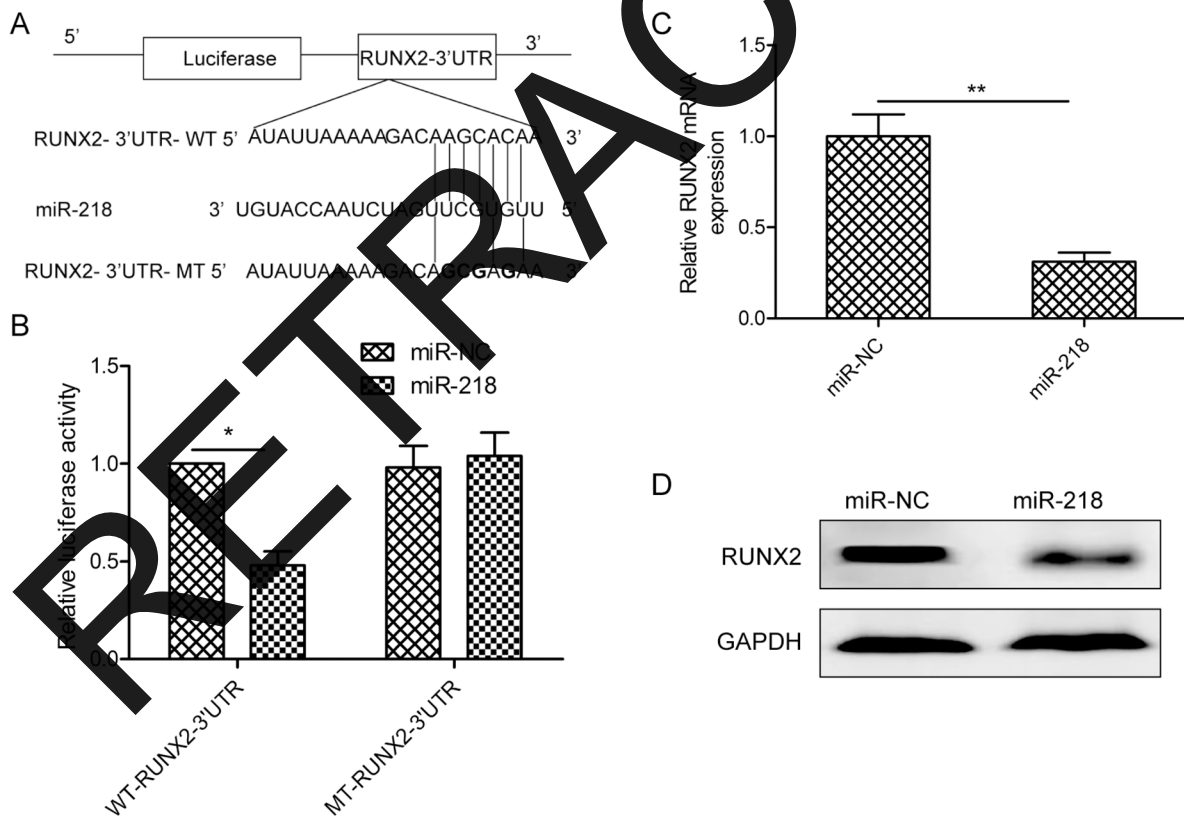

**Figure 3: MiR-218 targets RUNX2 in ovarian cancer cells.** (A) The miR-218 binding site predicted in the 3'-UTR regions of *RUNX2* mRNAs. Mutant constructs were generated at the seed regions of *RUNX2* 3'-UTRs as indicated by the underlined sequence. (B) Luciferase activities were determined in SKOV3 cells cotransfected with wild-type or mutant *RUNX2*-3'-UTR reporter plasmid and miR-NC or miR-218 mimic. (C, D) The *RUNX2* expression both on the mRNA and protein level was determined in SKOV3 cells transfected with miR-218 mimic or miR-NC by qPCR and Western blot, respectively. GAPDH was used for internal control. \*Indicates significant difference at  $p < 0.05$ ; \*\*Indicates significant difference at  $p < 0.01$ .

the mechanisms underlying miR-218 inhibition of ovarian cancer progression, we searched for potential targets of miR-218 in ovarian cancer cells using the computational algorithm TargetsCan7.1. Among the candidate target genes, we focused on runt-related transcription factor 2 (Runx2) an oncogene, which was reportedly overexpressed in ovarian cancer tissues [21], as a potential target of miR-218. We demonstrated that miR-218 negatively regulates RUNX2 by binding to a specific target site within the 3'-UTR of *RUNX2* by a luciferase reporter assay. Overexpression of miR-218 in human SKOV3 cells significantly inhibited RUNX2 expression at both the mRNA and protein levels. These studies suggest that *RUNX2* is a target gene in ovarian cancer, which is in accordance with previous studies that demonstrated miR-218 targets RUNX2 in non-small cell lung cancer [22] and human dental stem cells [23].

RUNX2, a member of runt-related transcription factors (RUNX), is a major transcription factor that

regulates osteoblast differentiation, chondrocyte proliferation, and differentiation in the endochondral bone formation process [24]. Runx2 has been shown to be involved in tumor occurrence, development, and metastasis in several types of cancers, such as breast [25], lung [26], prostate [27], and thyroid cancer [28]. RUNX2 expression was increased in ovarian cancer tissues and its upregulation was closely related with the clinical stage and poor prognosis of patients with ovarian cancer [21]. In addition, downregulation of RUNX2 expression significantly inhibited cell proliferation, migration, and invasion of ovarian cancer cells [29]. Specifically, RUNX2 has been reported to be regulated in ovarian cancer by miR-338-3p [30] and miR-23b [31]. These findings indicate that RUNX2 is an ovarian cancer oncogene. Consistent with previous results, our results show that RUNX2 expression is increased in ovarian cancer tissues and cell lines. RUNX2 expression was inversely correlated with miR-218 expression in ovarian cancer tissues.

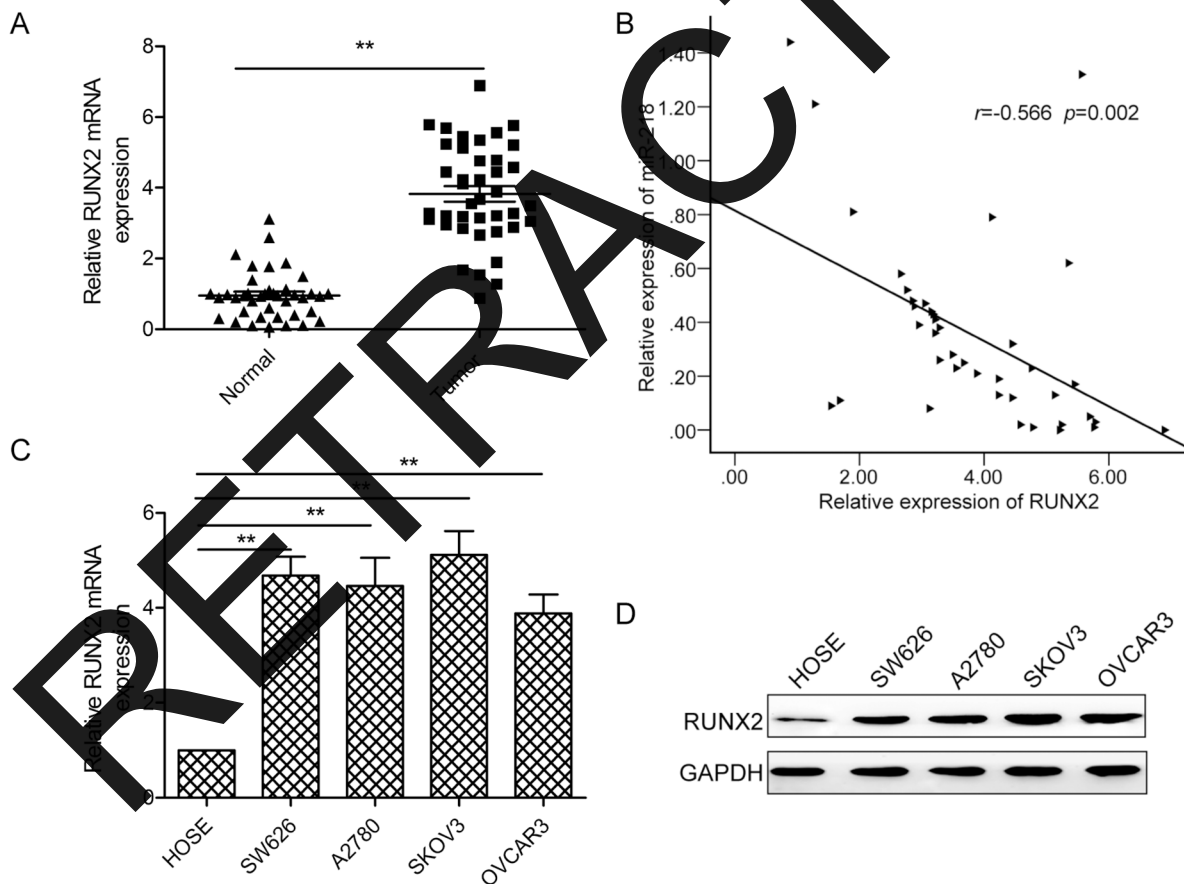

**Figure 4: RUNX2 expression is upregulated and inversely correlated with miR-218 expression in ovarian cancer tissues. (A)** *RUNX2* mRNA expression levels were detected by qPCR in 48 pairs of ovarian cancer tissues and adjacent normal tissues. GAPDH was used as an internal control. **(B)** Spearman's correlation analysis was used to determine the correlations between the expression levels of RUNX2 and miR-218 in human ovarian cancer tissues (n=48). **(C, D)** The RUNX2 expression both on the mRNA and protein level was determined in four ovarian cell lines (SW626, A2780, SKOV3, OVCAR3) and HOSE cells. GAPDH was used as an internal control. \*Indicates significant difference at  $p < 0.05$ ; \*\*Indicates significant difference at  $p < 0.01$ .

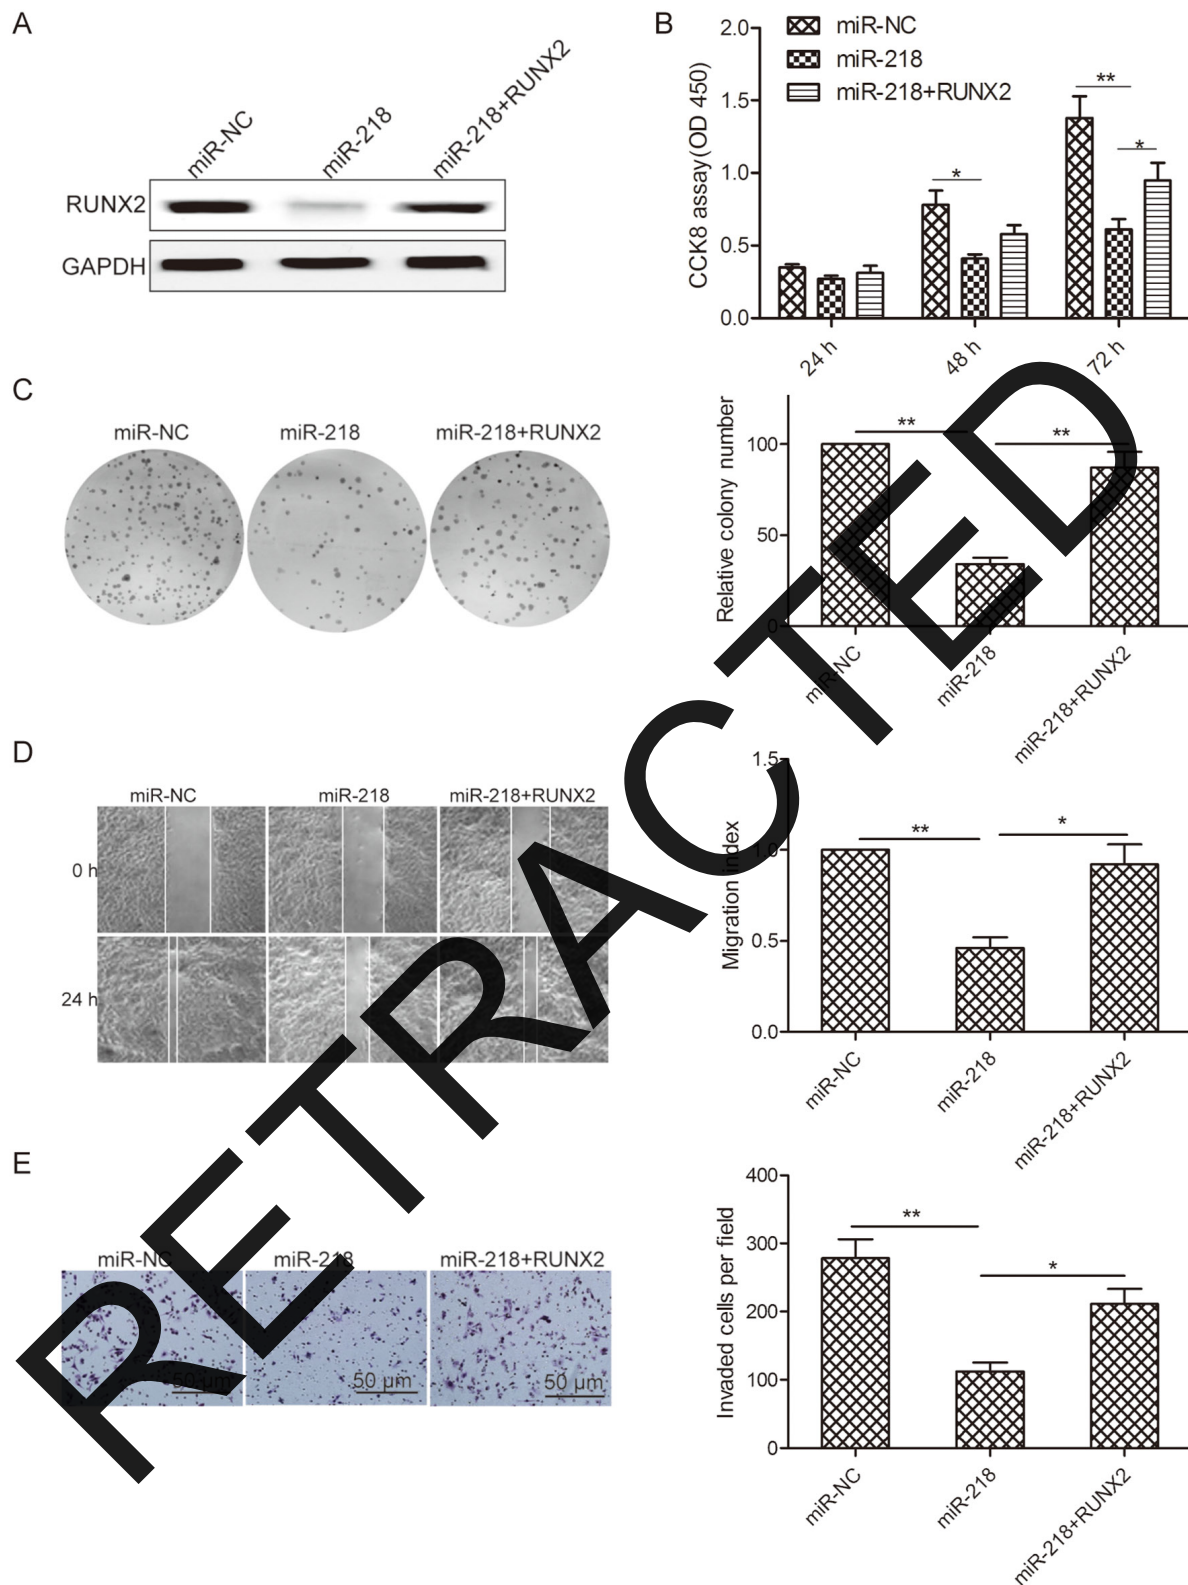

**Figure 5: Restoration of RUNX2 reverses miR-218-suppressed cell proliferation, colony formation, migration, and invasion of ovarian cancer cells. (A)** RUNX2 protein level was determined in SKOV3 cells transfected with miR-218 mimic or miR-NC with or without RUNX2 overexpression plasmid. GAPDH was used as an internal control. **(B-E)** Cell proliferation, colony formation, migration, and invasion were determined in SKOV3 cells transfected with miR-218 mimic or miR-NC with or without RUNX2 overexpression plasmid. \*Indicates significant difference at  $p < 0.05$ ; \*\*Indicates significant difference at  $p < 0.01$ .

RUNX2 overexpression rescued the suppressive effect of miR-218 on ovarian cancer cell proliferation, colony formation, migration, and invasion. These results suggest that miR-218 suppresses ovarian cancer, at least in part, by repressing RUNX2.

Due to our limited number of ovarian cancer samples and cell types, more elaborate studies will be

necessary for further exploration of the potential role of miR-218 in ovarian cancer progression. However, our study provides the first evidence that miR-218 expression is downregulated in ovarian cancer tissues and cell lines, and its expression level is significantly negatively associated with poor prognostic clinicopathological parameters. This work is the first to indicate that miR-218

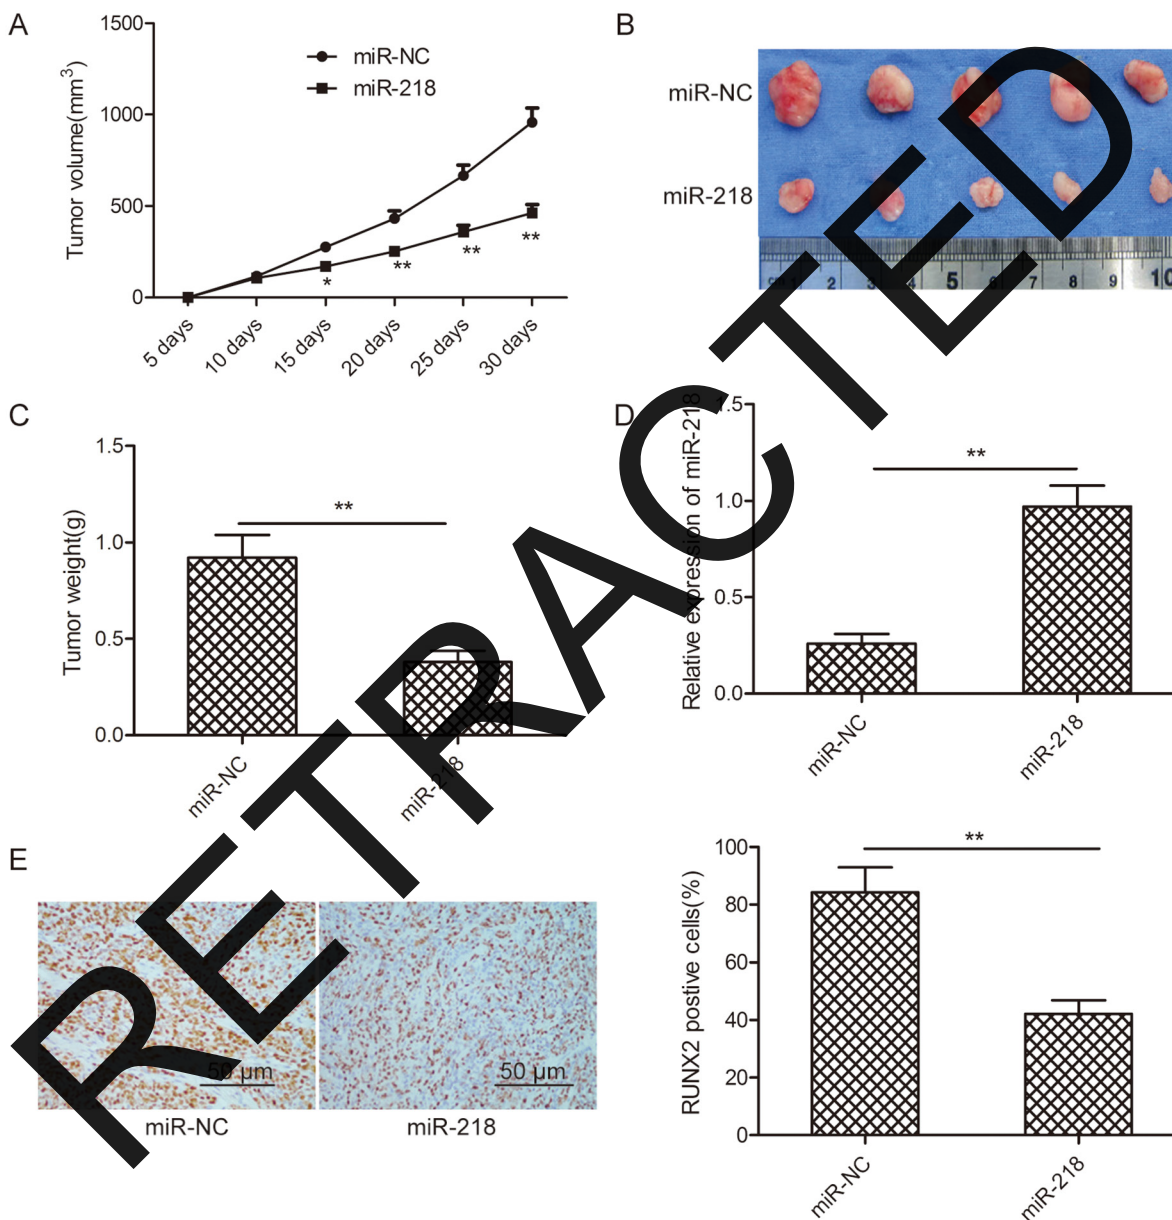

**Figure 6: miR-218 suppresses ovarian cancer growth *in vivo* by repressing RUNX2.** (A) Growth curves for tumor volumes in xenografts of nude mice from the miR-218 and miR-NC groups. (B) Representative images of tumors from the miR-218 and miR-NC groups. (C) Weights of tumors from the miR-218 and miR-NC groups. (D) The relative expression level of miR-218 was determined in tumor tissues from the miR-218 and miR-NC groups. U6 was used as an internal control. (E) RUNX2 protein expression level was determined in tumor tissues from the miR-218 and miR-NC groups by Western blot. GAPDH was used as the internal control.\*Indicates significant difference at  $p < 0.05$ ; \*\*Indicates significant difference at  $p < 0.01$ .



Biosciences, Franklin Lakes, NJ, USA). The lower chamber was filled with medium containing 10% FBS. After 48h of incubation, non-invading cells were removed with a cotton swab, while cells that had migrated to the bottom surface were fixed with 70% ethanol, stained with 0.1% crystal violet, and photographed under a light microscope. Cells were counted in five randomly selected fields using Image J software (National Institutes of Health, Bethesda, MD, USA).

### Bioinformatic prediction and dual luciferase reporter assay

TargetScan7.1 ([www.targetscan.org](http://www.targetscan.org)) was used to predict the putative target genes of miR-218. The 3'-untranslated region (3'-UTR) of RUNX2, containing predicted miR-218 binding sites, was amplified from human ovarian cDNA by PCR and subcloned into the pGL3 dual-luciferase expression vector (Promega, Madison, WI, USA). Mutant 3'-UTR was obtained by overlap-extension PCR. SKOV3 cells were cotransfected with wild-type or mutant RUNX2 3' UTR reported plasmid and miR-218 mimic or miR-NC using Lipofectamine 2000 per the manufacturer's recommendation. After 48 h of transfection, luciferase activity was determined using a dual-luciferase reporter assay system (Promega). Results are presented as the ratio of Renilla luciferase activity to firefly luciferase activity.

### Western blotting

Total protein was extracted from cultured cells or tissues using RIPA lysis buffer (Beyotime Biotech, China), and protein concentrations were measured with the bicinchoninic acid method (BCA, Pierce, Rockford, IL, USA). Equal amounts of protein (30 µg) were separated by 10% sodium dodecyl sulfate polyacrylamide gel electrophoresis (SDS-PAGE) and transferred to nitrocellulose membranes (Amersham Bioscience, USA). Membranes were incubated with primary antibody against RUNX2 and GAPDH (both from Santa Cruz Biotechnology, California, USA) at 1:1000 dilution, followed by horseradish peroxidase-labeled secondary antibody (Santa Cruz Biotechnology) at 1:5000 dilution. The protein signal bands were detected using an enhanced chemiluminescence detection reagent (ECL; Thermo Scientific, Rockford, IL, USA).

### Immunohistochemistry

Immunohistochemistry was performed in tumor tissues using the streptavidin-peroxidase (SP) method (Ultra Sensitive TM-SP) as described previously [32]. Scores were independently performed by two pathologists blinded to the identity of the tissue specimens as described

[33]. The RUNX2 positive cells were photographed with Inverted Research Microscope (Olympus).

### *In vivo* tumorigenesis assay

For *in vivo* tumorigenesis assays, stable SKOV3 cells with high expression of miR-218 were established by transfecting SKOV3 cells with a miR-218 mimic.  $2 \times 10^6$  SKOV3 cells stable expressing miR-218 or miR-NC were subcutaneously injected into the flanks of female BALB/c-nude mice (18-22g, 6-7 weeks of age). Tumor size was determined by measuring tumor length (L) and width (W) using a Vernier caliper every five days until mice were sacrificed. Tumor volume (mm<sup>3</sup>) was calculated using the formula:  $(V) = 1/2 \times L \times W^2$ . At 25 days after injection, mice were sacrificed and subcutaneous tumor tissues were dissected and weighed. All animal handling and research protocols were approved by the Animal Care and Use Ethics Committee of the First of Hospital of Jilin University (Changchun, China).

### Statistical analysis

All data are presented as the mean  $\pm$  standard deviation (SD) from at least three independent experiments. Student's *t* test was used to analyze differences between two groups. One-way ANOVA was used to analyze differences between three or more groups. SPSS 19.0 software (SPSS, Inc., Chicago, IL, USA) was used for statistical analysis. *P* values < 0.05 were considered statistically significant.

### FINANCIAL SUPPORT

This work was supported by the Project of Health and Family Planning Commission of Jilin (2010Z100).

### CONFLICTS OF INTEREST

The authors declare that they have no conflicts of interest.

### REFERENCES

1. Siegel R, Naishadham D, Jemal A. Cancer statistics, 2013. *CA Cancer J Clin.* 2013; 63: 11-30. <https://doi.org/10.3322/caac.21166>.
2. Permuth-Wey J, Sellers TA. Epidemiology of ovarian cancer. *Methods Mol Biol.* 2009; 472: 413-37. [https://doi.org/10.1007/978-1-60327-492-0\\_20](https://doi.org/10.1007/978-1-60327-492-0_20).
3. Lengyel E. Ovarian cancer development and metastasis. *Am J Pathol.* 2010; 177: 1053-64. <https://doi.org/10.2353/ajpath.2010.100105>.
4. Lim LP, Lau NC, Garrett-Engle P, Grimson A, Schelter JM, Castle J, Bartel DP, Linsley PS, Johnson JM. Microarray

- analysis shows that some microRNAs downregulate large numbers of target mRNAs. *Nature*. 2005; 433: 769-73. <https://doi.org/10.1038/nature03315>.
5. Ambs S, Prueitt RL, Yi M, Hudson RS, Howe TM, Petrocca F, Wallace TA, Liu CG, Volinia S, Calin GA, Yfantis HG, Stephens RM, Croce CM. Genomic profiling of microRNA and messenger RNA reveals deregulated microRNA expression in prostate cancer. *Cancer Res*. 2008; 68: 6162-70. <https://doi.org/10.1158/0008-5472.CAN-08-0144>.
  6. Hobert O. Gene regulation by transcription factors and microRNAs. *Science*. 2008; 319: 1785-6. <https://doi.org/10.1126/science.1151651>.
  7. Iorio MV, Croce CM. MicroRNAs in cancer: small molecules with a huge impact. *J Clin Oncol*. 2009; 27: 5848-56. <https://doi.org/10.1200/JCO.2009.24.0317>.
  8. Kinoshita Y, Sawada K, Nakamura K, Kimura T. The role of microRNAs in ovarian cancer. *Biomed Res Int*. 2014; 2014: 249393. <https://doi.org/10.1155/2014/249393>.
  9. Wang Y, Kim S, Kim IM. Regulation of Metastasis by microRNAs in Ovarian Cancer. *Front Oncol*. 2014; 4: 143. <https://doi.org/10.3389/fonc.2014.00143>.
  10. Yu H, Gao G, Jiang L, Guo L, Lin M, Jiao X, Jia W, Huang J. Decreased expression of miR-218 is associated with poor prognosis in patients with colorectal cancer. *Int J Clin Exp Pathol*. 2013; 6: 2904-11.
  11. Xiangyuan Z, Jiaqiang D, Yan H, Ming Z, Zhen L, Na W, Mingzuo J, Zhe Z, Gang L, Haiming L, Yongzhan Daiming F, Jun T. miR-218 inhibited tumor angiogenesis by targeting ROBO1 in gastric cancer. *Gene*. 2017. <https://doi.org/10.1016/j.gene.2017.03.022>.
  12. Shi ZM, Wang L, Shen H, Jiang CF, Guo X, Li DW, Wen YY, Sun HR, Pan MH, Li W, Shu YQ, Liu Z, Heiper SC, et al. Downregulation of miR-218 contributes to epithelial-mesenchymal transition and tumor metastasis in lung cancer by targeting Slug/ZEB2 signaling. *Oncogene*. 2017. <https://doi.org/10.1038/ncr.2017.414>.
  13. Liu B, Tian Y, Li F, Zhao Z, Jiang X, Zhai C, Han X, Zhang L. Tumor-suppressing roles of miR-214 and miR-218 in breast cancer. *Oncol Rep*. 2016; 33: 3178-84. <https://doi.org/10.3892/or.2016.4740>.
  14. Zhang X, Shi H, Tang H, Jiang Z, Wang J, Cui S. miR-218 inhibits tumor invasion and migration of colon cancer cells by targeting the PI3K/Akt/mTOR signaling pathway. *Int J Mol Med*. 2015; 35: 1301-8. <https://doi.org/10.3892/ijmm.2015.2122>.
  15. Fu WM, Tang LP, Zhu X, Lu YF, Zhang YL, Lee WY, Wang H, Yu Y, Liang WC, Ko CH, Xu HX, Kung HF, Zhang JF. MiR-218-targeting-Bmi-1 mediates the suppressive effect of 1,6,7-trihydroxyxanthone on liver cancer cells. *Apoptosis*. 2015; 20: 75-82. <https://doi.org/10.1007/s10495-014-1047-3>.
  16. Alajez NM, Lenarduzzi M, Ito E, Hui AB, Shi W, Bruce J, Yue S, Huang SH, Xu W, Waldron J, O'Sullivan B, Liu FF. MiR-218 suppresses nasopharyngeal cancer progression through downregulation of survivin and the SLIT2-ROBO1 pathway. *Cancer Res*. 2011; 71: 2381-91. <https://doi.org/10.1158/0008-5472.CAN-10-2754>.
  17. Nagaraj AB, Joseph P, DiFeo A. miRNAs as prognostic and therapeutic tools in epithelial ovarian cancer. *Biomark Med*. 2015; 9: 241-57. <https://doi.org/10.2217/bmm.14.108>.
  18. Liu Y, Lin X, Bao T, Ni P, Xie C, Shen H, Xu W, Xu H, Su Z. Detection and correlation analysis of miRNAs and myeloid-derived suppressor cells in ovarian cancer-bearing mice. [Article in Chinese]. *Xi Bao Yu Fen Zi Mian Yi Xue Za Zhi*. 2015; 31: 467-9, 73.
  19. Li J, Ping Z, Ning H. MiR-218 impacts tumor growth and increases chemo-sensitivity to cisplatin in cervical cancer. *Int J Mol Sci*. 2012; 13: 16053-64. <https://doi.org/10.3390/ijms131216053>.
  20. Guan H, Wei G, Wu J, Fang D, Luo Z, Zhao H, Li M, Li Y. Down-regulation of miR-218-2 and its host gene SLIT3 cooperate to promote invasion and progression of thyroid cancer. *J Clin Endocrinol Metab*. 2013; 98: E1334-44. <https://doi.org/10.1210.2013-1053>.
  21. Li W, Xu S, Lin S, Zhao W. Overexpression of runt-related transcription factor-2 is associated with advanced tumor progression and poor prognosis in epithelial ovarian cancer. *J Biomed Biotechnol*. 2012; 2012: 456534. <https://doi.org/10.1155/2012/456534>.
  22. Xie J, Ma F, Li D, Zhu X, Zhang X, Lv Z. MicroRNA-218 regulates cisplatin (DPP) chemosensitivity in non-small cell lung cancer by targeting RUNX2. *Tumour Biol*. 2016; 37: 1197-204. <https://doi.org/10.1007/s13277-015-3831-2>.
  23. Gay I, Cavender A, Peto D, Sun Z, Speer A, Cao H, Amendt BA. Differentiation of human dental stem cells reveals a role for microRNA-218. *J Periodontol Res*. 2014; 49: 110-20. <https://doi.org/10.1111/jre.12086>.
  24. Vishal M, Ajeetha R, Keerthana R, Selvamurugan N. Regulation of Runx2 by Histone Deacetylases in Bone. *Curr Protein Pept Sci*. 2016; 17: 343-51.
  25. Onodera Y, Miki Y, Suzuki T, Takagi K, Akahira J, Sakyu T, Watanabe M, Inoue S, Ishida T, Ohuchi N, Sasano H. Runx2 in human breast carcinoma: its potential roles in cancer progression. *Cancer Sci*. 2010; 101: 2670-5. <https://doi.org/10.1111/j.1349-7006.2010.01742.x>.
  26. Li H, Zhou RJ, Zhang GQ, Xu JP. Clinical significance of RUNX2 expression in patients with nonsmall cell lung cancer: a 5-year follow-up study. *Tumour Biol*. 2013; 34: 1807-12. <https://doi.org/10.1007/s13277-013-0720-4>.
  27. Brubaker KD, Vessella RL, Brown LG, Corey E. Prostate cancer expression of runt-domain transcription factor Runx2, a key regulator of osteoblast differentiation and function. *Prostate*. 2003; 56: 13-22. <https://doi.org/10.1002/pros.10233>.
  28. Niu DF, Kondo T, Nakazawa T, Oishi N, Kawasaki T, Mochizuki K, Yamane T, Katoh R. Transcription factor Runx2 is a regulator of epithelial-mesenchymal transition

- and invasion in thyroid carcinomas. *Lab Invest.* 2012; 92: 1181-90. <https://doi.org/10.1038/labinvest.2012.84>.
29. Wang ZQ, Keita M, Bachvarova M, Gobeil S, Morin C, Plante M, Gregoire J, Renaud MC, Sebastianelli A, Trinh XB, Bachvarov D. Inhibition of RUNX2 transcriptional activity blocks the proliferation, migration and invasion of epithelial ovarian carcinoma cells. *PLoS One.* 2013; 8: e74384. <https://doi.org/10.1371/journal.pone.0074384>.
  30. Wen C, Liu X, Ma H, Zhang W, Li H. miR3383p suppresses tumor growth of ovarian epithelial carcinoma by targeting Runx2. *Int J Oncol.* 2015; 46: 2277-85. <https://doi.org/10.3892/ijo.2015.2929>.
  31. Li W, Liu Z, Chen L, Zhou L, Yao Y. MicroRNA-23b is an independent prognostic marker and suppresses ovarian cancer progression by targeting runt-related transcription factor-2. *FEBS Lett.* 2014; 588: 1608-15. <https://doi.org/10.1016/j.febslet.2014.02.055>.
  32. Wang P, Meng X, Huang Y, Lv Z, Liu J, Wang G, Meng W, Xue S, Zhang Q, Zhang P, Chen G. MicroRNA-497 inhibits thyroid cancer tumor growth and invasion by suppressing BDNF. *Oncotarget.* 2017; 8: 2825-34. <https://doi.org/10.18632/oncotarget.13747>.
  33. Zhang W, Liu S, Liu K, Wang Y, Ji B, Zhang X, Liu Y. A disintegrin and metalloprotease (ADAM)10 is highly expressed in hepatocellular carcinoma and is associated with tumour progression. *J Int Med Res.* 2014; 42: 611-8. <https://doi.org/10.1177/0300060513505500>.

RETRACTED
